# Supplementary material
Source: HighWire-hosted journal article supplement (https://bjsm.bmj.com/content/54/7/408)
Supplement: inline-supplementary-material-1 [file inline-supplementary-material-1.pdf]

**Supplementary Table 1. As Treated Analyses of Cluster Adjusted Cox Proportional Hazard Ratios comparing the incidence of SRCs between the Head gear brands for males and females**

|                    |      |     |       | Multivariate<br>Risk Ratio |              | Multivariate<br>Hazard Ratio |                   |
|--------------------|------|-----|-------|----------------------------|--------------|------------------------------|-------------------|
| All Subjects       | n    | SRC | % SRC | (95% CI)                   | P-value      | (95% CI)                     | P-value           |
| None (No HG group) | 1546 | 75  | 4.9   | reference                  | --           | reference                    | --                |
| FORCEFIELD         | 498  | 27  | 5.4   | 0.92 (0.49-1.70)           | 0.782        | 1.09 (0.62-1.91)             | 0.765             |
| FULL90             | 386  | 12  | 3.1   | 0.59 (0.29-1.24)           | 0.164        | 0.69 (0.31-1.56)             | 0.377             |
| STORELLI           | 523  | 13  | 2.5   | 0.43 (0.21-0.89)           | <b>0.023</b> | 0.54 (0.20-1.43)             | 0.213             |
| UNEQUAL            | 94   | 3   | 3.2   | 0.57 (0.17-1.98)           | 0.380        | 0.70 (0.25-1.97)             | 0.504             |
| <b>Males</b>       |      |     |       |                            |              |                              |                   |
| None (No HG group) | 548  | 10  | 1.8   | reference                  | --           | reference                    | --                |
| FORCEFIELD         | 135  | 8   | 5.9   | 2.91 (0.75-11.3)           | 0.123        | 3.13 (1.18-8.28)             | <b>0.021</b>      |
| FULL90             | 154  | 1   | 0.6   | 0.26 (0.02-2.81)           | 0.268        | 0.31 (0.04-2.35)             | 0.259             |
| STORELLI           | 159  | 3   | 1.9   | 0.74 (0.15-3.78)           | 0.721        | 1.08 (0.15-7.60)             | 0.935             |
| UNEQUAL            | 23   | 0   | 0.0   | 0.00 (0.00-Inf)            | 0.999        | 0.00 (0.00-0.00)             | <b>&lt; 0.001</b> |
| <b>Females</b>     |      |     |       |                            |              |                              |                   |
| None (No HG group) | 998  | 65  | 6.5   | reference                  | --           | reference                    | --                |
| FORCEFIELD         | 363  | 19  | 5.2   | 0.78 (0.40-1.51)           | 0.462        | 0.86 (0.45-1.63)             | 0.648             |
| FULL90             | 232  | 11  | 4.7   | 0.80 (0.38-1.68)           | 0.550        | 0.79 (0.34-1.86)             | 0.594             |
| STORELLI           | 364  | 10  | 2.7   | 0.41 (0.19-0.90)           | <b>0.026</b> | 0.46 (0.20-1.05)             | 0.066             |
| UNEQUAL            | 71   | 3   | 4.2   | 0.68 (0.20-2.35)           | 0.541        | 0.80 (0.27-2.34)             | 0.678             |

As Treated designation is based on majority head gear use (yes/no) for those without an SRC and whether they were wearing head gear when SRC occurred for those with SRC.

The LDR head gear brand was only used by 3 athletes, none had SRC, therefore these athletes were not included in specific head gear brand analysis.

Multivariable analysis consisted of poisson regression and Cox PH survival analysis controlling for Age, Sex, Year, Previous Concussion in last year, and Symptom Severity Group as covariates and school cluster effect.
